# Supplementary material for: Structural insights into heme binding to IL-36α proinflammatory cytokine
Source: PubMed Central journal article supplement (PMC6858345; doi:10.1038/s41598-019-53231-0), 2019-11-15
Supplement: 41598_2019_53231_MOESM1_ESM.pdf [file 41598_2019_53231_MOESM1_ESM.pdf]

## Supplementary Information

# Structural insights into heme binding to IL-36 $\alpha$ proinflammatory cytokine

Amelie Wißbrock<sup>a,1</sup>, Nishit B. Goradia<sup>b,1,2</sup>, Amit Kumar<sup>b</sup>, Ajay Abisheck Paul George<sup>a</sup>, Toni Kühl<sup>a</sup>, Peter Bellstedt<sup>c</sup>, Ramadurai Ramachandran<sup>b</sup>, Patrick Hoffmann<sup>d,e</sup>, Kerstin Galler<sup>d,e</sup>, Jürgen Popp<sup>e,f</sup>, Ute Neugebauer<sup>d,e,f</sup>, Kornelia Hampel<sup>g</sup>, Bastian Zimmermann<sup>g</sup>, Susanne Adam<sup>h</sup>, Maximilian Wiendl<sup>h</sup>, Gerhard Krönke<sup>h</sup>, Iqbal Hamza<sup>i,j</sup>, Stefan H. Heinemann<sup>k</sup>, Silke Frey<sup>h</sup>, Axel J. Hueber<sup>h</sup>, Oliver Ohlenschläger<sup>b,\*</sup>, and Diana Imhof<sup>a,\*</sup>

<sup>a</sup>Pharmaceutical Biochemistry and Bioanalytics, Pharmaceutical Institute, University of Bonn, D-53121 Bonn, Germany;

<sup>b</sup>CS Protein Production, Leibniz Institute on Aging/Fritz Lipmann Institute, D-07745 Jena, Germany;

<sup>c</sup>Institute of Organic and Macromolecular Chemistry (IOMC), Friedrich Schiller University Jena, D-07743 Jena, Germany;

<sup>d</sup>Center for Sepsis Control and Care (CSCC), Jena University Hospital, D-07747 Jena, Germany;

<sup>e</sup>Leibniz Institute of Photonic Technology (Leibniz IPHT), D-07745 Jena, Germany;

<sup>f</sup>Institute of Physical Chemistry and Abbe Center of Photonics, Friedrich Schiller University Jena, D-07743 Jena, Germany;

<sup>g</sup>Biaffin GmbH & Co KG, D-34132 Kassel, Germany;

<sup>h</sup>Department of Internal Medicine 3 – Rheumatology and Immunology, University of Erlangen-Nürnberg (FAU) and University Hospital Erlangen, D-91054 Erlangen, Germany;

<sup>i</sup>Department of Animal & Avian Sciences, University of Maryland, College Park, MD 20742;

<sup>j</sup>Department of Cell Biology & Molecular Genetics, University of Maryland, College Park, MD 20742;

<sup>k</sup>Center for Molecular Biomedicine, Department of Biophysics, Friedrich Schiller University Jena and Jena University Hospital, D-07745 Jena, Germany;

<sup>1</sup>These authors contributed equally.

<sup>2</sup>Current address: European Molecular Biology Laboratory, D-22607 Hamburg, Germany.

\*Correspondence: dimhof@uni-bonn.de, oliver.ohlenschlaeger@leibniz-fli.de



**Figure S1. Spectroscopic studies on heme-IL-36 $\alpha$  and heme-peptide complexes.** **(A)** Surface plasmon resonance (SPR) spectra of heme-incubated IL-36 $\alpha$  and controls (BSA, lysozyme; spectra in black, data fits in red). A  $K_D$  of 6 to 11  $\mu$ M for the first and 30 to 41  $\mu$ M for the second binding event was determined for BSA. It was not possible to determine the  $K_D$  of lysozyme due to weak signals. Lysozyme was thus considered as non-binder as earlier described (Shen et al., 2014). **(B)** Sequence alignment of IL-36 $\alpha$ ,  $\beta$ ,  $\gamma$  (including all isoforms), and IL-36Ra by Clustal Omega (Sievers et al., 2011). Potential heme-coordinating residues are marked in blue (Y), green (H), and purple (C). IL-36 $\alpha$  is the only variant with a CP motif (P137 in yellow), whereas other amino acids were identified in IL-36 $\beta$  (isoform 1: K136S137, isoform 2: Q135P136) and IL-36 $\gamma$  (isoform 1: Q147P148, isoform 2: Q112P113) at the same position. From the ten potential HRMs in IL-36 $\alpha$ , several motifs can be excluded due to their location and/or negative net charge as was earlier defined (Supplementary Table S2)<sup>10,11</sup>.

**(C)** UV/Vis differential spectra for heme-incubated IL-36 $\alpha$ -derived peptides 1-7. Peptides 2 and 4 (Cys-mutants) as well as 6 (Y108AH) and 7 (Y108AH109A) displayed no heme binding thereby verifying the essential role of Cys (2, 4) and Tyr (6, 7). Peptide 3 (Cys only) exhibited a maximum shift to  $\sim$ 319 nm and to  $\sim$ 416 nm ( $K_D$  determination was not possible). Heme binding to peptide 1 (YH) revealed a UV/Vis band shift to  $\sim$ 415 nm with a  $K_D$  value of  $4.48 \pm 2.20 \mu$ M. Peptide 5 (YH109A) showed a UV/Vis band shift to  $\sim$ 418 nm with a  $K_D$  value of  $2.29 \pm 1.32 \mu$ M. A different binding mode of peptides 1 and 5 is visible from the diverging curve shape and a loss of affinity (5) confirms an impact of Tyr and partially His in wild-type peptide 1. **(D)** SDS PAGE of IL-36 $\alpha$  proteins (Coomassie blue-stained 18% reducing gel). The proteins (left: full-length, right: truncated) are ordered as follows: 1) wild-type, 2) Y108S, 3) H109A, 4) C136SP137A, 5) Y108SH109A, 6) Y108SC136SP137A, 7) H109AC136SP137A, and 8) Y108SH109AC136SP137A. Molecular weight markers are indicated. **(E)** Fluorescence intensity of heme-incubated controls (BSA, lysozyme) as well as IL-36 $\alpha$  and trIL-36 $\alpha$  ( $\lambda_{ex}$  306 nm,  $\lambda_{em}$  352 nm). Heme-protein complex formation resulted in static quenching (hyperbolic decay function) in contrast to dynamic quenching (linear decay function) as previously described (Peherstorfer et al., 2018). Lysozyme was confirmed as non-binder (static quenching only) and BSA as binder (dynamic and static quenching) as

reported earlier (Shen et al., 2014). For IL-36 $\alpha$  a similar trend as found for BSA was observed. **(F)** Differential absorption spectra of heme-incubated (0-40  $\mu$ M) BSA and lysozyme. A broad band as found for lysozyme hints at unspecific heme-protein interaction (Peherstorfer et al., 2018).

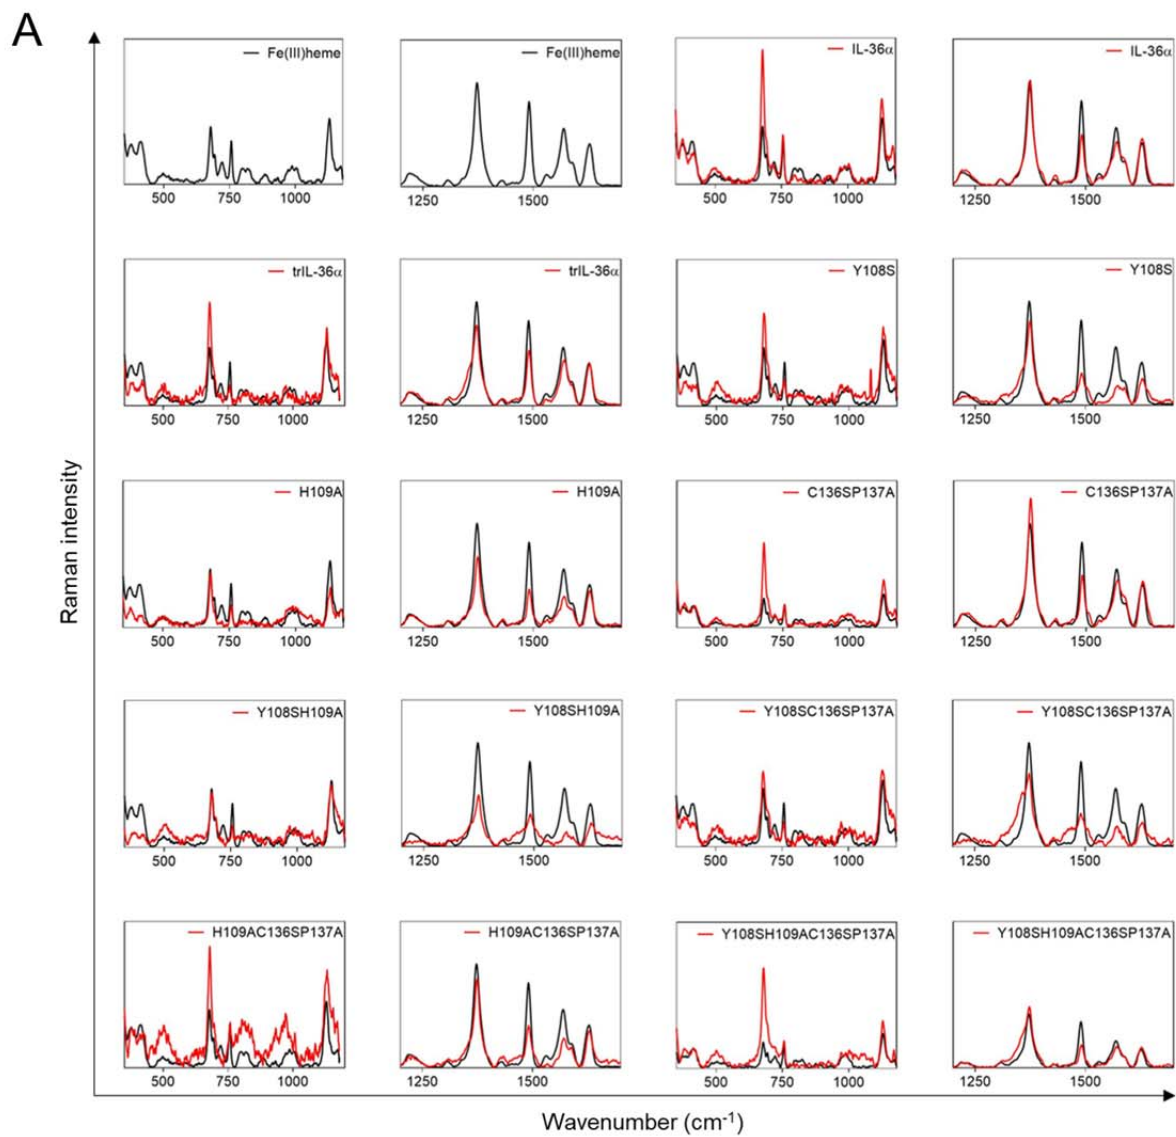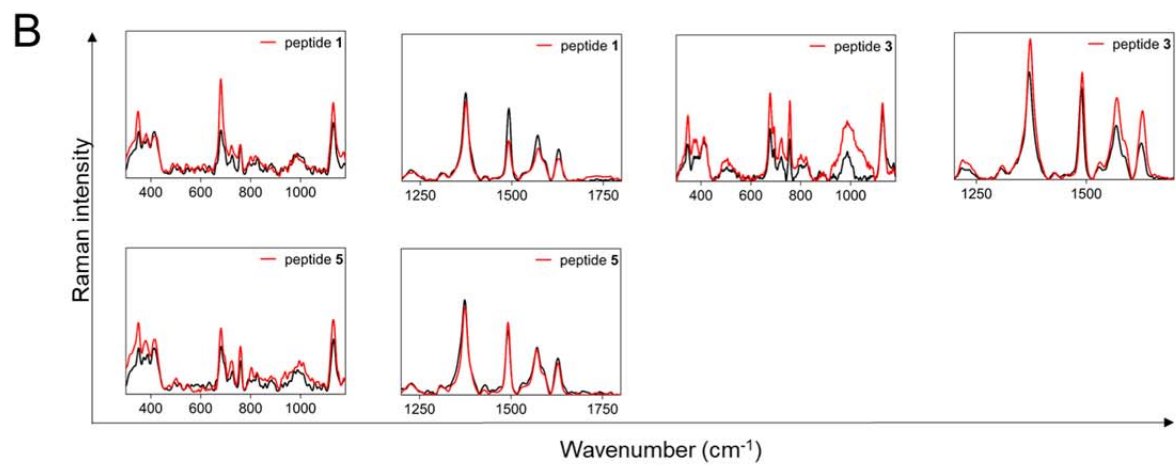

**Figure S2. Resonance Raman spectroscopy of IL-36 $\alpha$ , mutant proteins, and IL-36 $\alpha$ -derived peptides.** (A) Resonance Raman spectra of heme (in black), wild-type (tr)IL-36 $\alpha$ , and IL-36 $\alpha$  protein mutants (all proteins in red). Lower (left) and higher (right) wavenumber fingerprint region with assignment of prominent normal mode frequencies  $\nu_7$  (681  $\text{cm}^{-1}$ ),  $\nu_4$  (1374  $\text{cm}^{-1}$ ),  $\nu_3$  (1492  $\text{cm}^{-1}$ ),  $\nu_2$  (1571  $\text{cm}^{-1}$ ), and  $\nu_{10}$  (1628  $\text{cm}^{-1}$ ) for heme. To increase the visibility of the spectra at low wavenumbers, lower wavenumbers an adapted y-axis scaling was applied. For the C136SP137A mutant a decrease in intensity of the  $\nu_3$  and  $\nu_2$  bands and an increase of intensity of the vibrational mode  $\nu_7$  (around 681  $\text{cm}^{-1}$ ) as well as the oxidation state marker band  $\nu_4$  (around 1374  $\text{cm}^{-1}$  for Fe(III)) might indicate the negligible formation of a hexacoordinated heme-complex (Supplementary Table S1)<sup>27</sup>. Yet, this behavior was neither present in all four mutants of the CP motif nor occurred it to the same extent and thus should be interpreted with caution. (B) Resonance Raman spectra of heme-incubated peptides **1**, **3**, and **5**. Data analysis was performed as described in (A). Peptide **3** was measured in another experiment than the other complexes.

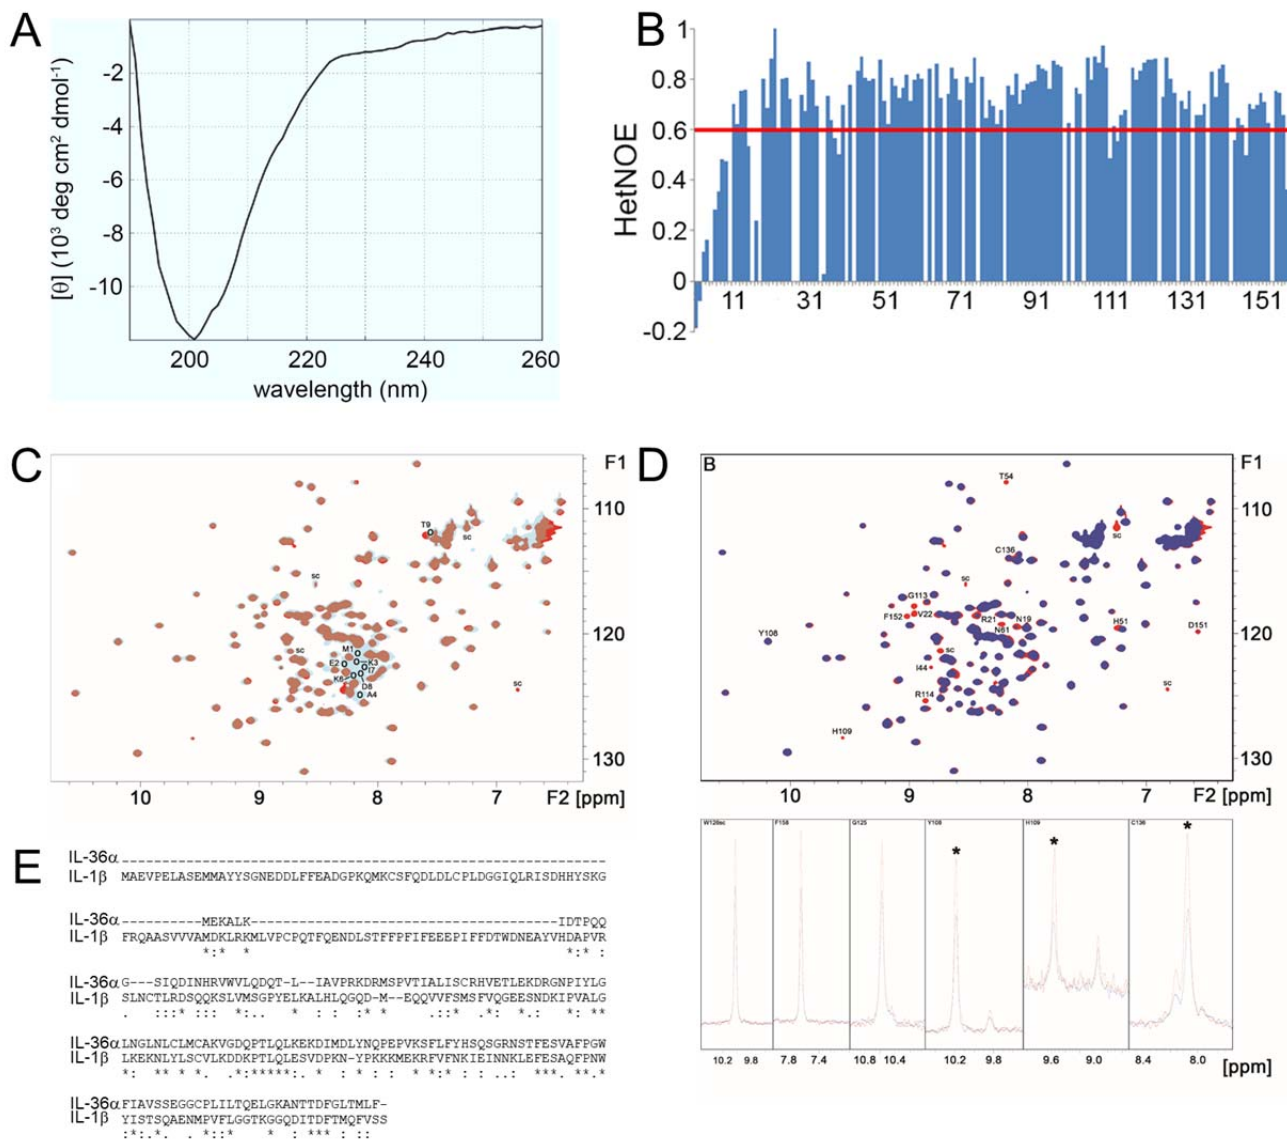

**Figure S3. Structural analysis of IL-36 $\alpha$  in free and heme-bound form. (A)** The negative band at 203 nm in the CD spectrum of IL-36 $\alpha$  suggests a rather disordered secondary structure (Table S6). The prediction for wild-type IL-36 $\alpha$  can be summarized as a minor content of  $\alpha$ -helix ( $\sim 10\%$ ), between 20 and 35%  $\beta$ -sheet fold, and a large fraction ( $\sim 50\text{-}70\%$ ) of irregular structural elements. **(B)** The  $\{^1\text{H}, ^{15}\text{N}\}$  heteronuclear NOE data of IL-36 $\alpha$  provides information about the motion of the N-H bond vectors and thus the protein backbone dynamics. Values below 0.6 indicate an increased mobility. **(C)** Comparison of the  $[^1\text{H}, ^{15}\text{N}]$ -HSQC spectra of full-length (cyan) and truncated IL-36 $\alpha$  (red). Missing or

shifted signals of the N-terminal residues in trIL-36 $\alpha$  are indicated by black circles (sc ~ side chain signal). **(D)** Structural analysis of heme binding to trIL-36 $\alpha$ . Top: Superposition of the [ $^1\text{H}$ ,  $^{15}\text{N}$ ]-HSQC spectra of trIL-36 $\alpha$  in the free (red) and heme-bound state (blue). A drastic decrease in signal intensities is observed for residues N19, R21, V22, I44, H51, T54, N61, H109, G113, R114, D151, and F152 (sc ~ side chain signal). Bottom: Moderate changes compared to e.g. H109 apply to Y108 and C136 (relevant cross peaks marked by \*). For comparison of the uniform drop in signal intensities as a result of the solvent paramagnetic effect, the traces of the binding-independent residues F158 and G125 as well as the side chain signal of W126 are given on the left. **(E)** Sequence alignment of IL-36 $\alpha$  and IL-1 $\beta$  was performed using Clustal Omega (Sievers et al., 2011).



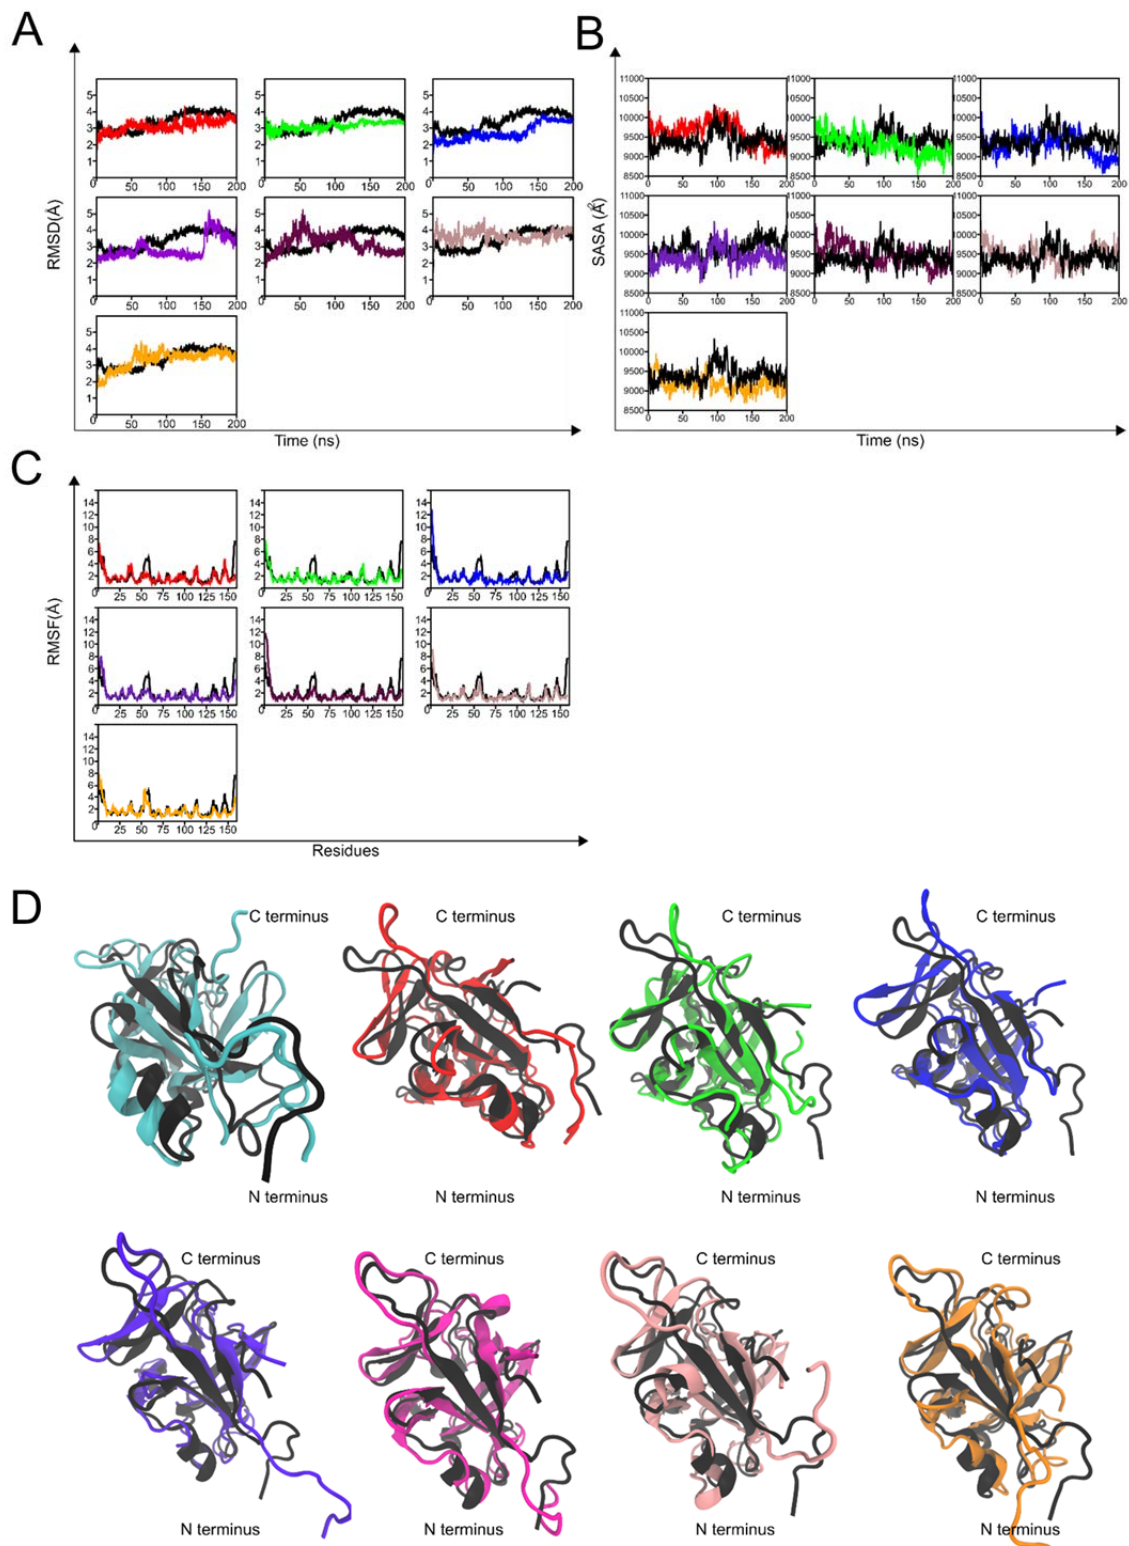

**Figure S4. Computational studies on IL-36 $\alpha$  wildtype and mutant proteins.** Protein mutants in A-C are presented as follows: Y108S (red), H109A (green), Y108SH109A (blue), C136SP137A (indigo), Y108SC136SP137A (maroon), H109AC136SP137A mutant (brown), and Y108SH109AC136SP137A (orange). **(A)** Backbone RMSD (root mean square deviation) generated from the MD simulations. The IL-36 $\alpha$  proteins reach sufficient equilibration at around 150 ns of simulation time. The average RMSD change of the wild-type IL-36 $\alpha$  structure with reference to the NMR starting structure was 3.34 Å (Table S7). This structural deviation largely arises from the extreme fluctuations exhibited by the residues at the C- and N-terminal regions of the protein, as can be seen from the RMSF (root mean square fluctuation per residue) plots in **(B)**. The residues at the termini fluctuate at about 8 Å from their mean positions which has a consequent impact on the overall RMSD value. The conformational ensemble produced by the MD simulations are a suitable representation of the NMR ensemble of the protein given that the NMR structures differ from each other by RMSD values up to 2.74 Å (data not shown). The disordered regions of the N-terminal region in the NMR ensemble are also seen in the conformations sampled in MD simulations and are quantified by the high RMSF values associated with them. **(C)** SASA (solvent accessible surface area) comparison between wild-type and mutant IL-36 $\alpha$  structures show evolution of the SASA to lower values for the Y108SH109A mutant and higher values for the C136SP137A mutants and no significant deviation from the wild-type in the other mutants. This is a logical consequence of replacing residues with higher mean SASA values (46 Å<sup>2</sup> for Y and 54 Å<sup>2</sup> for H) by ones with lower values (39 Å<sup>2</sup> for S and 28 Å<sup>2</sup> for A). The increase of SASA for the C136P137A mutants can also be explained similarly given that the mean SASA values for C (17 Å<sup>2</sup>) is much lower than that of S (39 Å<sup>2</sup>). The SASA values (Y-axis) start from 8500 onwards to avoid visual obfuscation. **(D)** Structural superimposition over C $\alpha$  atoms of the NMR starting structure of IL-36 $\alpha$  (black) and the final frame from the MD simulations of the IL-36 $\alpha$  wild-type (cyan, A) and mutants Y108S (red), H109A (green), Y108SH109A (blue), C136SP137A (violet), Y108SC136SP137A (magenta), H109AC136SP137A (pink), and Y108SH109AC136SP137A (orange). All structures are represented by the “new cartoon” style in VMD (Visual Molecular Dynamics) (Humphrey et al., 1996). MD simulations of the heme-bound

complexes revealed that C136-mediated heme binding was a prerequisite for stable coordination of heme via Y108. As observed from the RMSF profiles, heme binding to C136 supported by P137 and other surrounding residues reduced the conformational flexibility of loops 6, 10, and some parts of loop 3 (Figures 4B, D). This binding-induced constraint has a dampening effect on the flexibility of the rest of the protein rendering it conformationally favorable for the binding event via Y108. Although heme coordination via Y108 is still observed upon loss of the CP motif, MD simulations of the complex resulted in heme dislocation from the Y108 binding site into solution in about 5 ns of the simulation (*Movie S1*). With heme bound to C136 (e.g. wild-type IL-36 $\alpha$ ), however, the binding of the second heme molecule to Y108 persists for a much longer period of time (~150 ns in 200 ns MD simulations, *Movie S2*). To investigate coordination via the H109 residue, heme was docked to the protein by narrowing down the docking search space to the vicinity of H109. Yet, MD simulations revealed almost instantaneous dislocation of heme from the protein surface suggesting a lower preference of heme to bind via H109 over Y108. Apart from heme binding via the proposed motifs, an additional heme interaction was observed for all proteins investigated. This interplay was characterized by the Fe(III) ion found at a distance 2.42 Å from the oxygen atom of the S104 residue. This observation might explain heme binding to the Y108SH109AC136SP137A mutant as found by UV/Vis spectroscopy. This S104-mediated attachment of heme may have an influence on the protein by inducing a restraining effect on the protein's conformational flexibility. Although no coordinative interactions were observed, the electrostatic and hydrophobic interactions between heme and the protein surface at this interface may facilitate a surface attachment.

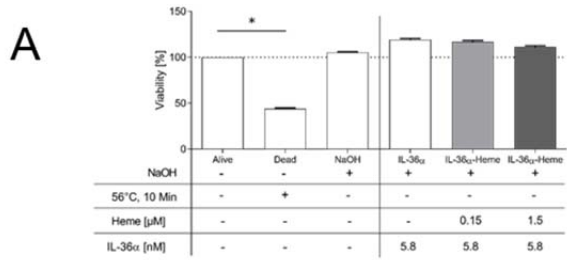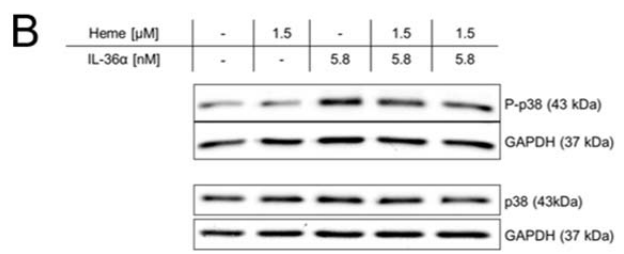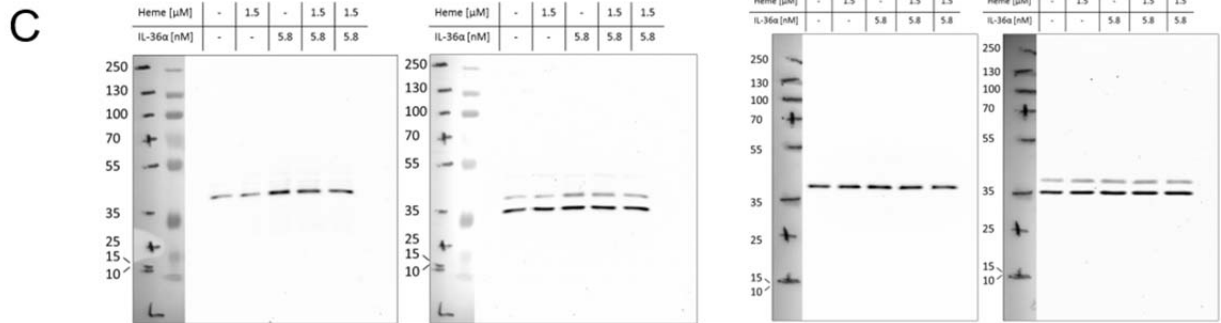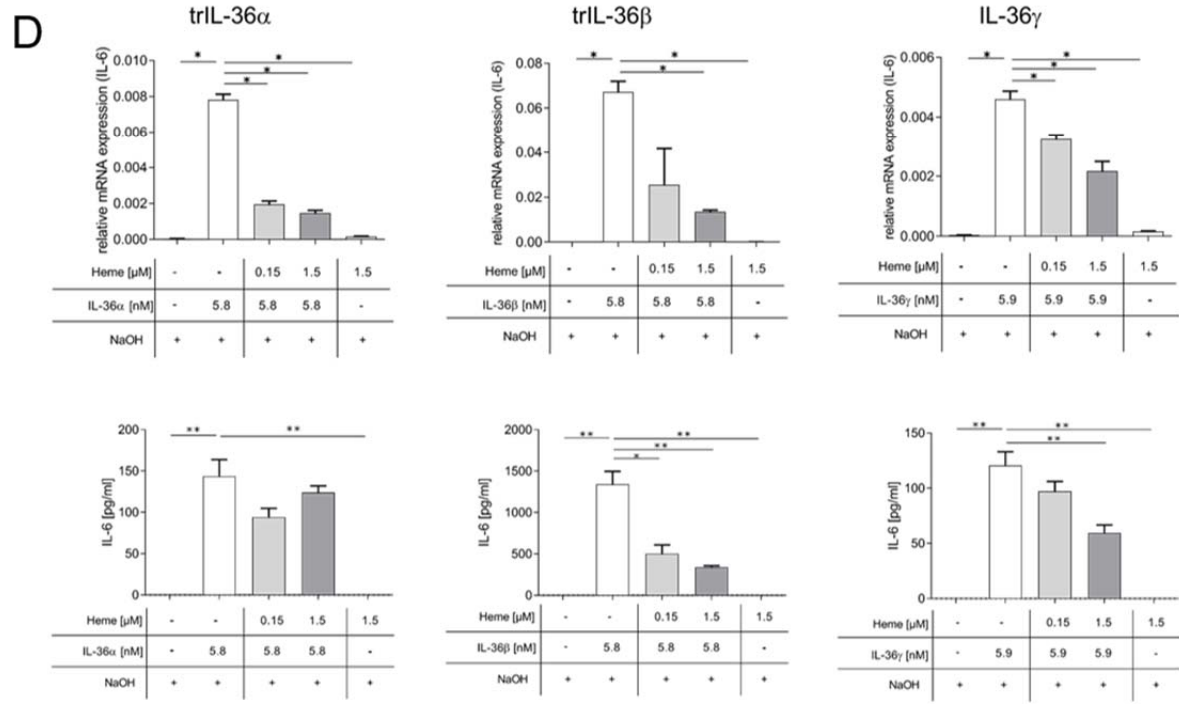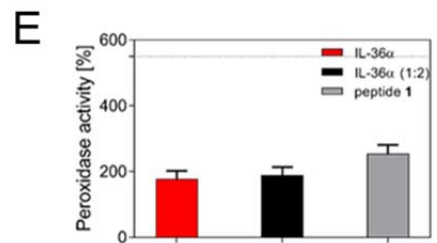

**Figure S5. Biological testing of the agonistic trIL-36 $\alpha$  family members.** (A) Cell viability upon treatment of synovial fibroblast-like synoviocytes (FLS) from RA patients with trIL-36 $\alpha$ , heme, and the trIL-36 $\alpha$ -heme complex for 24 h. IL-36 $\alpha$  and the respective agent were preincubated for 1 h prior to the addition to FLS. Cell viability was analyzed by the AlamarBlue assay according to the manufacturer's instruction (#741802, Invitrogen, Carlsbad, CA, USA). Statistical analysis of samples with reduced cell viability compared to the alive control was performed using Wilcoxon matched-pairs signed rank test with \* $p < 0.05$ . Values are means + SEM (n=6). (B) Impact of heme on IL-36 $\alpha$ -induced intracellular signaling in FLS from RA patients. FLS were treated with varying trIL-36 $\alpha$  to heme ratios for 5 min. trIL-36 $\alpha$  was preincubated with heme for 1 h prior to addition to the FLS. Western blot analysis was performed using antibodies such as rabbit anti-P-p38, rabbit anti-p38, and rabbit anti-GAPDH (Cell Signaling Technology, Leiden, the Netherlands). As secondary antibody anti-rabbit HRP (Biozol, Eching, Germany) was used. Detection was performed using Pierce™ ECL Western Blotting Substrate (Thermo Fisher Scientific, Dreieich, Germany) according to the manufacturer's instruction. Shown is one representative (of n=4) Western blot for phosphorylated p38 (P-p38) and p38 with respective GAPDH loading control. Western Blots were cropped for clarity and full-length blots are presented in (C). (D) Heme reduces trIL-36 $\alpha$ ,  $\beta$ , and  $\gamma$ -induced gene expression in FLS from RA patients. FLS were treated with varying ratios of recombinant human IL-36 $\alpha$ , IL-36 $\beta$ , and IL-36 $\gamma$  (R&D Systems, Minneapolis, MN) to heme for 24 h. The left panel shows the relative mRNA expression of IL-6 normalized to GAPDH as analyzed by qRT-PCR, whereas the right panel illustrates the concentration of IL-6 in the cell culture supernatant as measured by ELISA. Values are means + SEM (n=5). Statistical analysis was performed using Mann-Whitney test with \* $p < 0.05$  and \*\* $p < 0.01$ . (E) Peroxidase-like activity (Atamna and Boyle, 2006; Atamna and Frey, 2004; Ghosh et al., 2015; Wißbrock et al., 2017) of heme-incubated IL-36 $\alpha$  (1:1 and 1:2, protein:heme) and peptide 1. No significant increase of the heme's peroxidase activity (100%) was observed which is in agreement with the results obtained for the CP-based HRM on peptide level in previous studies (Wißbrock et al., 2017).



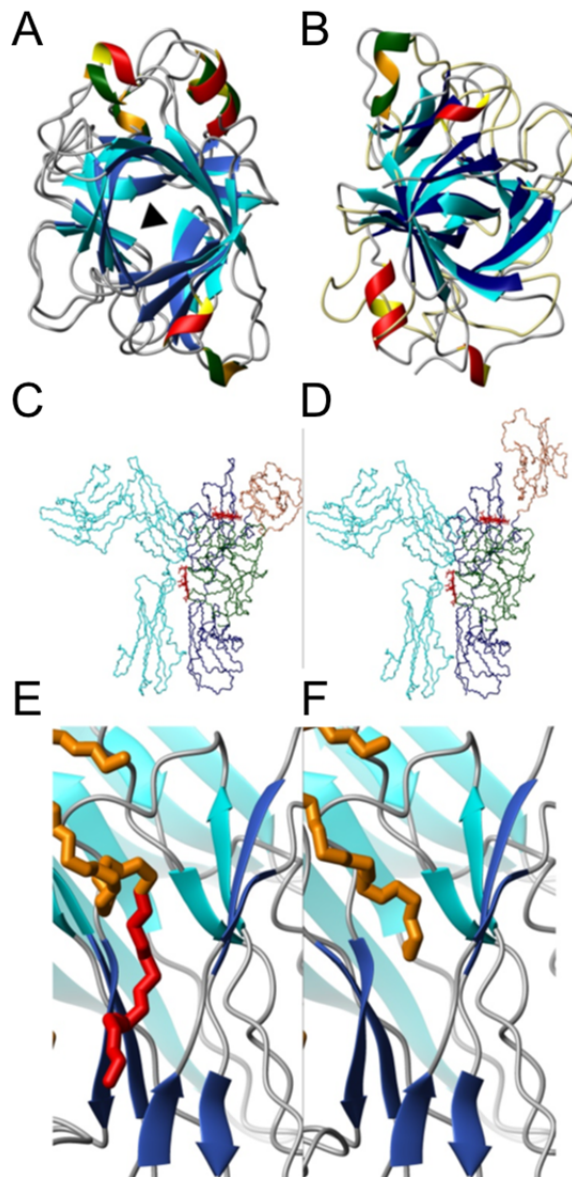

**Figure S6. IL-36 $\alpha$  structural comparison to IL-36 $\gamma$  and IL-1 $\beta$  as well as IL-36 $\alpha$  superimposition with the IL-1 $\beta$  receptor.** (A) Superimposition of the NMR structure of IL-36 $\alpha$  and IL-36 $\gamma$  (PDB code: 4IZE). The NMR structure of IL-36 $\alpha$  ( $\beta$ -strands cyan; helices red/yellow) and the X-ray structure of IL-36 $\gamma$  ( $\beta$ -strands navy; helices green/orange) are displayed. The trefoil pseudo-D3 symmetry axis is indicated by a black triangle. (B) Superimposition of the NMR structure of IL-36 $\alpha$  and IL-1 $\beta$  (PDB code: 3O4O). The NMR-structure of IL-36 $\alpha$  ( $\beta$ -strands cyan; helices red/yellow, backbone grey) and the X-ray structure of IL-1 $\beta$  ( $\beta$ -strands navy; helices green/orange; backbone khaki) are displayed.

**(C)** Superimposition of the NMR solution structure of IL-36 $\alpha$  with the IL-1 $\beta$  in the receptor complex (PDB code: 3O4O). **(C, D)** View of the full complex model. The wild-type N-terminal residues and loop 3 (red) show steric clashes with the IL-1RII domain-III and domain-I, respectively. **(E, F)** Truncation of the IL-36 $\alpha$  sequence by the N-terminal five amino acids allows to resolve the steric interactions with two  $\beta$ -strands of IL-1RII (E) and to accommodate the flexible N-terminal stretch into a V-shaped cleft of IL-1RII domain-III (F). Rotation about the torsion angle  $\phi$  of Asp315 in IL-1RII leads to a repositioning of the full IL-1RII domain-I thereby resolving van der Waals clashes with loop 3 of IL-36 $\alpha$ . Coloring: IL-36 $\alpha$  – green, IL-1RII domain-I – coral, IL-1RII domain-II and domain-III – navy, IL-1RAcP – cyan, IL-36 $\alpha$  cysteine-136 – yellow, IL-36 $\alpha$  loop 3, and N-terminal residues Met1-Leu5 – red, IL-1RII Asp315 C $^{\alpha}$  – magenta.



**Table S1.** Binding data of heme-incubated IL-36 $\alpha$ , trIL-36 $\alpha$ , trIL-36 $\beta$ , trIL-36 $\gamma$  as well as of IL-36 $\alpha$  protein mutants. SPR, UV/Vis, and resonance Raman spectroscopy were applied to the individual heme-incubated protein variants as required.

| Protein              | SPR<br>K <sub>D1</sub> [ $\mu$ M] | SPR<br>K <sub>D2</sub> [ $\mu$ M] | UV/Vis<br>nUV<br>K <sub>D1</sub> [ $\mu$ M] | UV/Vis<br>Soret<br>K <sub>D2</sub> [ $\mu$ M] | Raman<br>coordination<br>state |                      |      |      |                 |                  |      |         |                      |                    |         |                 |                  |                  |         |                      |                 |                |         |                  |                  |                  |                      |                  |                 |         |                  |                  |                  |                 |                      |                  |         |         |                  |                  |         |                 |                      |      |         |                 |                  |      |         |                      |                  |         |                 |                  |            |         |                  |                  |                  |                      |                 |                 |      |                  |                  |                  |         |                      |                 |      |      |                  |                  |         |         |                      |      |      |
|----------------------|-----------------------------------|-----------------------------------|---------------------------------------------|-----------------------------------------------|--------------------------------|----------------------|------|------|-----------------|------------------|------|---------|----------------------|--------------------|---------|-----------------|------------------|------------------|---------|----------------------|-----------------|----------------|---------|------------------|------------------|------------------|----------------------|------------------|-----------------|---------|------------------|------------------|------------------|-----------------|----------------------|------------------|---------|---------|------------------|------------------|---------|-----------------|----------------------|------|---------|-----------------|------------------|------|---------|----------------------|------------------|---------|-----------------|------------------|------------|---------|------------------|------------------|------------------|----------------------|-----------------|-----------------|------|------------------|------------------|------------------|---------|----------------------|-----------------|------|------|------------------|------------------|---------|---------|----------------------|------|------|
| trIL-36 $\alpha$ *   | 12.7                              | 3.0                               | n.d.                                        | n.d.                                          | n.d.                           |                      |      |      |                 |                  |      |         |                      |                    |         |                 |                  |                  |         |                      |                 |                |         |                  |                  |                  |                      |                  |                 |         |                  |                  |                  |                 |                      |                  |         |         |                  |                  |         |                 |                      |      |         |                 |                  |      |         |                      |                  |         |                 |                  |            |         |                  |                  |                  |                      |                 |                 |      |                  |                  |                  |         |                      |                 |      |      |                  |                  |         |         |                      |      |      |
|                      | 9.3                               | 4.4                               |                                             |                                               |                                | trIL-36 $\beta$ *    | 10.0 | 4.1  | n.d.            | n.d.             | n.d. | 13.9    | 3.7                  | trIL-36 $\gamma$ * | 8.9     | 5.3             | n.d.             | n.d.             | n.d.    | 15.9                 | 4.1             | IL-36 $\alpha$ | 6.1     | 10.2             | 2.69 $\pm$ 1.15  | 11.50 $\pm$ 3.06 | 5c                   | 4.4              | 7.1             | ~369 nm | ~416 nm          | Y108S            | n.d.             | n.d.            | -                    | 30.69 $\pm$ 7.49 | 5c      | ~418 nm | H109A            | n.d.             | n.d.    | 0.77 $\pm$ 0.53 | 10.35 $\pm$ 3.16     | 5c   | ~369 nm | 416 nm          | Y108SH109A       | n.d. | n.d.    | n.p.*                | 13.64 $\pm$ 4.69 | 5c      | ~368 nm         | ~420 nm          | C136SP137A | n.d.    | n.d.             | -                | 12.69 $\pm$ 4.43 | 5c**                 | ~415 nm         | Y108SC136SP137A | n.d. | n.d.             | -                | 15.17 $\pm$ 4.35 | 5c      | ~419 nm              | H109AC136SP137A | n.d. | n.d. | -                | 13.29 $\pm$ 3.12 | 5c      | ~417 nm | Y108SH109AC136SP137A | n.d. | n.d. |
| trIL-36 $\beta$ *    | 10.0                              | 4.1                               | n.d.                                        | n.d.                                          | n.d.                           |                      |      |      |                 |                  |      |         |                      |                    |         |                 |                  |                  |         |                      |                 |                |         |                  |                  |                  |                      |                  |                 |         |                  |                  |                  |                 |                      |                  |         |         |                  |                  |         |                 |                      |      |         |                 |                  |      |         |                      |                  |         |                 |                  |            |         |                  |                  |                  |                      |                 |                 |      |                  |                  |                  |         |                      |                 |      |      |                  |                  |         |         |                      |      |      |
|                      | 13.9                              | 3.7                               |                                             |                                               |                                | trIL-36 $\gamma$ *   | 8.9  | 5.3  | n.d.            | n.d.             | n.d. | 15.9    | 4.1                  | IL-36 $\alpha$     | 6.1     | 10.2            | 2.69 $\pm$ 1.15  | 11.50 $\pm$ 3.06 | 5c      | 4.4                  | 7.1             | ~369 nm        | ~416 nm | Y108S            | n.d.             | n.d.             | -                    | 30.69 $\pm$ 7.49 | 5c              | ~418 nm | H109A            | n.d.             | n.d.             | 0.77 $\pm$ 0.53 | 10.35 $\pm$ 3.16     | 5c               | ~369 nm | 416 nm  | Y108SH109A       | n.d.             | n.d.    | n.p.*           | 13.64 $\pm$ 4.69     | 5c   | ~368 nm | ~420 nm         | C136SP137A       | n.d. | n.d.    | -                    | 12.69 $\pm$ 4.43 | 5c**    | ~415 nm         | Y108SC136SP137A  | n.d.       | n.d.    | -                | 15.17 $\pm$ 4.35 | 5c               | ~419 nm              | H109AC136SP137A | n.d.            | n.d. | -                | 13.29 $\pm$ 3.12 | 5c               | ~417 nm | Y108SH109AC136SP137A | n.d.            | n.d. | -    | 14.23 $\pm$ 3.82 | 5c**             | ~421 nm |         |                      |      |      |
| trIL-36 $\gamma$ *   | 8.9                               | 5.3                               | n.d.                                        | n.d.                                          | n.d.                           |                      |      |      |                 |                  |      |         |                      |                    |         |                 |                  |                  |         |                      |                 |                |         |                  |                  |                  |                      |                  |                 |         |                  |                  |                  |                 |                      |                  |         |         |                  |                  |         |                 |                      |      |         |                 |                  |      |         |                      |                  |         |                 |                  |            |         |                  |                  |                  |                      |                 |                 |      |                  |                  |                  |         |                      |                 |      |      |                  |                  |         |         |                      |      |      |
|                      | 15.9                              | 4.1                               |                                             |                                               |                                | IL-36 $\alpha$       | 6.1  | 10.2 | 2.69 $\pm$ 1.15 | 11.50 $\pm$ 3.06 | 5c   | 4.4     | 7.1                  | ~369 nm            | ~416 nm | Y108S           | n.d.             | n.d.             | -       | 30.69 $\pm$ 7.49     | 5c              | ~418 nm        | H109A   | n.d.             | n.d.             | 0.77 $\pm$ 0.53  | 10.35 $\pm$ 3.16     | 5c               | ~369 nm         | 416 nm  | Y108SH109A       | n.d.             | n.d.             | n.p.*           | 13.64 $\pm$ 4.69     | 5c               | ~368 nm | ~420 nm | C136SP137A       | n.d.             | n.d.    | -               | 12.69 $\pm$ 4.43     | 5c** | ~415 nm | Y108SC136SP137A | n.d.             | n.d. | -       | 15.17 $\pm$ 4.35     | 5c               | ~419 nm | H109AC136SP137A | n.d.             | n.d.       | -       | 13.29 $\pm$ 3.12 | 5c               | ~417 nm          | Y108SH109AC136SP137A | n.d.            | n.d.            | -    | 14.23 $\pm$ 3.82 | 5c**             | ~421 nm          |         |                      |                 |      |      |                  |                  |         |         |                      |      |      |
| IL-36 $\alpha$       | 6.1                               | 10.2                              | 2.69 $\pm$ 1.15                             | 11.50 $\pm$ 3.06                              | 5c                             |                      |      |      |                 |                  |      |         |                      |                    |         |                 |                  |                  |         |                      |                 |                |         |                  |                  |                  |                      |                  |                 |         |                  |                  |                  |                 |                      |                  |         |         |                  |                  |         |                 |                      |      |         |                 |                  |      |         |                      |                  |         |                 |                  |            |         |                  |                  |                  |                      |                 |                 |      |                  |                  |                  |         |                      |                 |      |      |                  |                  |         |         |                      |      |      |
|                      | 4.4                               | 7.1                               | ~369 nm                                     | ~416 nm                                       |                                | Y108S                | n.d. | n.d. | -               | 30.69 $\pm$ 7.49 | 5c   | ~418 nm | H109A                | n.d.               | n.d.    | 0.77 $\pm$ 0.53 | 10.35 $\pm$ 3.16 | 5c               | ~369 nm | 416 nm               | Y108SH109A      | n.d.           | n.d.    | n.p.*            | 13.64 $\pm$ 4.69 | 5c               | ~368 nm              | ~420 nm          | C136SP137A      | n.d.    | n.d.             | -                | 12.69 $\pm$ 4.43 | 5c**            | ~415 nm              | Y108SC136SP137A  | n.d.    | n.d.    | -                | 15.17 $\pm$ 4.35 | 5c      | ~419 nm         | H109AC136SP137A      | n.d. | n.d.    | -               | 13.29 $\pm$ 3.12 | 5c   | ~417 nm | Y108SH109AC136SP137A | n.d.             | n.d.    | -               | 14.23 $\pm$ 3.82 | 5c**       | ~421 nm |                  |                  |                  |                      |                 |                 |      |                  |                  |                  |         |                      |                 |      |      |                  |                  |         |         |                      |      |      |
| Y108S                | n.d.                              | n.d.                              | -                                           | 30.69 $\pm$ 7.49                              | 5c                             |                      |      |      |                 |                  |      |         |                      |                    |         |                 |                  |                  |         |                      |                 |                |         |                  |                  |                  |                      |                  |                 |         |                  |                  |                  |                 |                      |                  |         |         |                  |                  |         |                 |                      |      |         |                 |                  |      |         |                      |                  |         |                 |                  |            |         |                  |                  |                  |                      |                 |                 |      |                  |                  |                  |         |                      |                 |      |      |                  |                  |         |         |                      |      |      |
|                      |                                   |                                   |                                             | ~418 nm                                       |                                | H109A                | n.d. | n.d. | 0.77 $\pm$ 0.53 | 10.35 $\pm$ 3.16 | 5c   | ~369 nm | 416 nm               | Y108SH109A         | n.d.    | n.d.            | n.p.*            | 13.64 $\pm$ 4.69 | 5c      | ~368 nm              | ~420 nm         | C136SP137A     | n.d.    | n.d.             | -                | 12.69 $\pm$ 4.43 | 5c**                 | ~415 nm          | Y108SC136SP137A | n.d.    | n.d.             | -                | 15.17 $\pm$ 4.35 | 5c              | ~419 nm              | H109AC136SP137A  | n.d.    | n.d.    | -                | 13.29 $\pm$ 3.12 | 5c      | ~417 nm         | Y108SH109AC136SP137A | n.d. | n.d.    | -               | 14.23 $\pm$ 3.82 | 5c** | ~421 nm |                      |                  |         |                 |                  |            |         |                  |                  |                  |                      |                 |                 |      |                  |                  |                  |         |                      |                 |      |      |                  |                  |         |         |                      |      |      |
| H109A                | n.d.                              | n.d.                              | 0.77 $\pm$ 0.53                             | 10.35 $\pm$ 3.16                              | 5c                             |                      |      |      |                 |                  |      |         |                      |                    |         |                 |                  |                  |         |                      |                 |                |         |                  |                  |                  |                      |                  |                 |         |                  |                  |                  |                 |                      |                  |         |         |                  |                  |         |                 |                      |      |         |                 |                  |      |         |                      |                  |         |                 |                  |            |         |                  |                  |                  |                      |                 |                 |      |                  |                  |                  |         |                      |                 |      |      |                  |                  |         |         |                      |      |      |
|                      |                                   |                                   | ~369 nm                                     | 416 nm                                        |                                | Y108SH109A           | n.d. | n.d. | n.p.*           | 13.64 $\pm$ 4.69 | 5c   | ~368 nm | ~420 nm              | C136SP137A         | n.d.    | n.d.            | -                | 12.69 $\pm$ 4.43 | 5c**    | ~415 nm              | Y108SC136SP137A | n.d.           | n.d.    | -                | 15.17 $\pm$ 4.35 | 5c               | ~419 nm              | H109AC136SP137A  | n.d.            | n.d.    | -                | 13.29 $\pm$ 3.12 | 5c               | ~417 nm         | Y108SH109AC136SP137A | n.d.             | n.d.    | -       | 14.23 $\pm$ 3.82 | 5c**             | ~421 nm |                 |                      |      |         |                 |                  |      |         |                      |                  |         |                 |                  |            |         |                  |                  |                  |                      |                 |                 |      |                  |                  |                  |         |                      |                 |      |      |                  |                  |         |         |                      |      |      |
| Y108SH109A           | n.d.                              | n.d.                              | n.p.*                                       | 13.64 $\pm$ 4.69                              | 5c                             |                      |      |      |                 |                  |      |         |                      |                    |         |                 |                  |                  |         |                      |                 |                |         |                  |                  |                  |                      |                  |                 |         |                  |                  |                  |                 |                      |                  |         |         |                  |                  |         |                 |                      |      |         |                 |                  |      |         |                      |                  |         |                 |                  |            |         |                  |                  |                  |                      |                 |                 |      |                  |                  |                  |         |                      |                 |      |      |                  |                  |         |         |                      |      |      |
|                      |                                   |                                   | ~368 nm                                     | ~420 nm                                       |                                | C136SP137A           | n.d. | n.d. | -               | 12.69 $\pm$ 4.43 | 5c** | ~415 nm | Y108SC136SP137A      | n.d.               | n.d.    | -               | 15.17 $\pm$ 4.35 | 5c               | ~419 nm | H109AC136SP137A      | n.d.            | n.d.           | -       | 13.29 $\pm$ 3.12 | 5c               | ~417 nm          | Y108SH109AC136SP137A | n.d.             | n.d.            | -       | 14.23 $\pm$ 3.82 | 5c**             | ~421 nm          |                 |                      |                  |         |         |                  |                  |         |                 |                      |      |         |                 |                  |      |         |                      |                  |         |                 |                  |            |         |                  |                  |                  |                      |                 |                 |      |                  |                  |                  |         |                      |                 |      |      |                  |                  |         |         |                      |      |      |
| C136SP137A           | n.d.                              | n.d.                              | -                                           | 12.69 $\pm$ 4.43                              | 5c**                           |                      |      |      |                 |                  |      |         |                      |                    |         |                 |                  |                  |         |                      |                 |                |         |                  |                  |                  |                      |                  |                 |         |                  |                  |                  |                 |                      |                  |         |         |                  |                  |         |                 |                      |      |         |                 |                  |      |         |                      |                  |         |                 |                  |            |         |                  |                  |                  |                      |                 |                 |      |                  |                  |                  |         |                      |                 |      |      |                  |                  |         |         |                      |      |      |
|                      |                                   |                                   |                                             | ~415 nm                                       |                                | Y108SC136SP137A      | n.d. | n.d. | -               | 15.17 $\pm$ 4.35 | 5c   | ~419 nm | H109AC136SP137A      | n.d.               | n.d.    | -               | 13.29 $\pm$ 3.12 | 5c               | ~417 nm | Y108SH109AC136SP137A | n.d.            | n.d.           | -       | 14.23 $\pm$ 3.82 | 5c**             | ~421 nm          |                      |                  |                 |         |                  |                  |                  |                 |                      |                  |         |         |                  |                  |         |                 |                      |      |         |                 |                  |      |         |                      |                  |         |                 |                  |            |         |                  |                  |                  |                      |                 |                 |      |                  |                  |                  |         |                      |                 |      |      |                  |                  |         |         |                      |      |      |
| Y108SC136SP137A      | n.d.                              | n.d.                              | -                                           | 15.17 $\pm$ 4.35                              | 5c                             |                      |      |      |                 |                  |      |         |                      |                    |         |                 |                  |                  |         |                      |                 |                |         |                  |                  |                  |                      |                  |                 |         |                  |                  |                  |                 |                      |                  |         |         |                  |                  |         |                 |                      |      |         |                 |                  |      |         |                      |                  |         |                 |                  |            |         |                  |                  |                  |                      |                 |                 |      |                  |                  |                  |         |                      |                 |      |      |                  |                  |         |         |                      |      |      |
|                      |                                   |                                   |                                             | ~419 nm                                       |                                | H109AC136SP137A      | n.d. | n.d. | -               | 13.29 $\pm$ 3.12 | 5c   | ~417 nm | Y108SH109AC136SP137A | n.d.               | n.d.    | -               | 14.23 $\pm$ 3.82 | 5c**             | ~421 nm |                      |                 |                |         |                  |                  |                  |                      |                  |                 |         |                  |                  |                  |                 |                      |                  |         |         |                  |                  |         |                 |                      |      |         |                 |                  |      |         |                      |                  |         |                 |                  |            |         |                  |                  |                  |                      |                 |                 |      |                  |                  |                  |         |                      |                 |      |      |                  |                  |         |         |                      |      |      |
| H109AC136SP137A      | n.d.                              | n.d.                              | -                                           | 13.29 $\pm$ 3.12                              | 5c                             |                      |      |      |                 |                  |      |         |                      |                    |         |                 |                  |                  |         |                      |                 |                |         |                  |                  |                  |                      |                  |                 |         |                  |                  |                  |                 |                      |                  |         |         |                  |                  |         |                 |                      |      |         |                 |                  |      |         |                      |                  |         |                 |                  |            |         |                  |                  |                  |                      |                 |                 |      |                  |                  |                  |         |                      |                 |      |      |                  |                  |         |         |                      |      |      |
|                      |                                   |                                   |                                             | ~417 nm                                       |                                | Y108SH109AC136SP137A | n.d. | n.d. | -               | 14.23 $\pm$ 3.82 | 5c** | ~421 nm |                      |                    |         |                 |                  |                  |         |                      |                 |                |         |                  |                  |                  |                      |                  |                 |         |                  |                  |                  |                 |                      |                  |         |         |                  |                  |         |                 |                      |      |         |                 |                  |      |         |                      |                  |         |                 |                  |            |         |                  |                  |                  |                      |                 |                 |      |                  |                  |                  |         |                      |                 |      |      |                  |                  |         |         |                      |      |      |
| Y108SH109AC136SP137A | n.d.                              | n.d.                              | -                                           | 14.23 $\pm$ 3.82                              | 5c**                           |                      |      |      |                 |                  |      |         |                      |                    |         |                 |                  |                  |         |                      |                 |                |         |                  |                  |                  |                      |                  |                 |         |                  |                  |                  |                 |                      |                  |         |         |                  |                  |         |                 |                      |      |         |                 |                  |      |         |                      |                  |         |                 |                  |            |         |                  |                  |                  |                      |                 |                 |      |                  |                  |                  |         |                      |                 |      |      |                  |                  |         |         |                      |      |      |
|                      |                                   |                                   |                                             | ~421 nm                                       |                                |                      |      |      |                 |                  |      |         |                      |                    |         |                 |                  |                  |         |                      |                 |                |         |                  |                  |                  |                      |                  |                 |         |                  |                  |                  |                 |                      |                  |         |         |                  |                  |         |                 |                      |      |         |                 |                  |      |         |                      |                  |         |                 |                  |            |         |                  |                  |                  |                      |                 |                 |      |                  |                  |                  |         |                      |                 |      |      |                  |                  |         |         |                      |      |      |

K<sub>D</sub>: dissociation constant, nUV: near UV, n.d.: not determined, n.p.: not possible, \*Proteins for SPR studies were purchased from R&D systems (see materials). \*\*Negligible indication of hexacoordination.

**Table S2.** Potential HRMs in IL-36 $\alpha$ , IL-36 $\beta$ , and IL-36 $\gamma$  based on cysteine, histidine, or tyrosine as heme-coordination site. Probability for heme binding was evaluated based on the sequence composition, the location within the protein structure, and the net charge of the potential sequence stretches (Brewitz et al., 2015, 2016). Protein sequences were retrieved from Uniprot (Bateman et al., 2017).

| No.                                                                 | Position | Amino acid sequence | Net charge | Heme-binding potential |
|---------------------------------------------------------------------|----------|---------------------|------------|------------------------|
| <b>IL-36<math>\alpha</math></b>                                     |          |                     |            |                        |
| <b>m1</b>                                                           | H20      | QDIN <b>HR</b> VWV  | 0/(+1)*    | -                      |
| <b>m2</b>                                                           | C49      | AL <b>ISCRH</b> VE  | 0/(+1)*    | -                      |
| <b>m3</b>                                                           | H51      | <b>ISCRH</b> VETL   | 0/(+1)*    | -                      |
| <b>m4</b>                                                           | Y64      | GN <b>PIYL</b> GLN  | 0          | -                      |
| <b>m5</b>                                                           | C73      | GL <b>NLC</b> LMCA  | 0**        | -                      |
| <b>m6</b>                                                           | C76      | <b>LCLM</b> CAKVG   | +1**       | -                      |
| <b>m7</b>                                                           | Y96      | IM <b>DLYN</b> QPE  | -2         | -                      |
| <b>m8</b>                                                           | Y108     | S <b>FLFYH</b> SQS  | 0/+1       | +                      |
| <b>m9</b>                                                           | H109     | <b>FLFYH</b> SQSG   | 0/+1       | +                      |
| <b>m10</b>                                                          | C136     | SE <b>GGC</b> PLIL  | -1         | +                      |
| <b>IL-36<math>\beta</math> (isoform 1)</b>                          |          |                     |            |                        |
| <b>m1</b>                                                           | Y12      | AP <b>KSYA</b> IRD  | +1         | +                      |
| <b>m2</b>                                                           | H44      | P <b>VTLHL</b> IAC  | 0/(+1)*    | -                      |
| <b>m3</b>                                                           | C48      | <b>HLIAC</b> RDTE   | -1/(+0)*   | -                      |
| <b>m4</b>                                                           | Y63      | GN <b>MVYL</b> GIK  | +1         | -                      |
| <b>m5</b>                                                           | C72      | G <b>KDLCL</b> FCA  | 0          | -                      |
| <b>m6</b>                                                           | C75      | <b>LCLF</b> CAEIQ   | -1         | -                      |
| <b>m7</b>                                                           | C100     | G <b>KDTC</b> WKLV  | +1         | +                      |
| <b>m8</b>                                                           | H107     | LV <b>GIHT</b> CIN  | 0/(+1)*    | -                      |
| <b>m9</b>                                                           | C109     | GI <b>HTC</b> INLD  | -1/(+0)*   | -                      |
| <b>m10</b>                                                          | C118     | V <b>RESC</b> FMGT  | 0          | -                      |
| <b>m11</b>                                                          | H141     | SS <b>FQHH</b> LR   | +1/(+4)*   | +                      |
| <b>m12</b>                                                          | H142     | S <b>FQHH</b> LRK   | +2/(+5)*   | +                      |
| <b>m13</b>                                                          | H143     | <b>FQHH</b> LRKK    | +3/(+6)*   | +                      |
| <b>IL-36<math>\beta</math> (isoform 2)</b>                          |          |                     |            |                        |
| <i>m1-m6 are identical to isoform 1 of IL-36<math>\beta</math>.</i> |          |                     |            |                        |
| <b>m7</b>                                                           | Y95      | IM <b>DLY</b> VEKK  | 0          | -                      |
| <b>m8</b>                                                           | H108     | FL <b>FFHN</b> KEG  | 0          | +                      |
| <b>m9</b>                                                           | Y123     | Q <b>SVSY</b> PGWF  | 0          | -                      |

|                           |        |                        |         |   |
|---------------------------|--------|------------------------|---------|---|
| <b>m10</b>                | Y153   | NTNFYLD <del>S</del> V | -1      | - |
| <b>IL-36γ (isoform 1)</b> |        |                        |         |   |
| <b>m1</b>                 | Y16*** | GRAVYQSMC              | +1      | + |
| <b>m2</b>                 | C20    | YQSMCKPIT              | +1      | + |
| <b>m3</b>                 | C61    | AVITCKYPE              | 0       | - |
| <b>m4</b>                 | Y63    | ITCKYPEAL              | 0       | - |
| <b>m5</b>                 | Y76    | GDPIYLGIQ              | -1      | - |
| <b>m6</b>                 | C85    | NPEMCLYCE              | -2      | - |
| <b>m7</b>                 | Y87    | EMCLYCEKV              | -1      | - |
| <b>m8</b>                 | C88    | MCLYCEKVG              | 0       | - |
| <b>m9</b>                 | Y108   | IMDLYGQPE              | -2      | - |
| <b>m10</b>                | Y120   | PFLFYRAKT              | +2      | - |
| <b>m11</b>                | Y159   | LGKSYNTAF              | +1      | + |
| <b>IL-36γ (isoform 2)</b> |        |                        |         |   |
| <b>m1</b>                 | Y16*** | GRAVYQSIT              | +1      | + |
| <b>m2</b>                 | C26    | AVITCKYPE              | +1      | + |
| <b>m3</b>                 | Y28    | ITCKYPEAL              | 0       | - |
| <b>m4</b>                 | Y41    | GDPIYLGIQ              | 0       | - |
| <b>m5</b>                 | C50    | NPEMCLYC               | -1      | - |
| <b>m6</b>                 | Y52    | NPEMCLYCE              | -2      | - |
| <b>m7</b>                 | C53    | EMCLYCEKV              | -1      | - |
| <b>m8</b>                 | Y73    | MCLYCEKVG              | 0       | - |
| <b>m9</b>                 | Y85    | IMDLYGQPE              | -2      | - |
| <b>m10</b>                | Y124   | PFLFYRAKT              | +2      | - |
| <b>m11</b>                | Y164   | LGKSYNTAF              | +1      | + |
| <b>IL-36Ra</b>            |        |                        |         |   |
| <b>m1</b>                 | C8     | SGALCFRMK              | +2      | + |
| <b>m2</b>                 | Y20    | LKVL <del>Y</del> LHNN | +1(+2*) | + |
| <b>m3</b>                 | H22    | VLYLHNNQL              | 0/(+1*) | + |
| <b>m4</b>                 | H32    | AGGLHAGKV              | +1      | - |
| <b>m5</b>                 | C67    | GGSQCLSCG              | 0       | - |
| <b>m6</b>                 | C70    | QCLSCGVGQ              | 0       | - |
| <b>m7</b>                 | Y89    | IMELYLGAK              | 0       | - |
| <b>m8</b>                 | Y101   | SFTFYRRDM              | +1      | - |
| <b>m9</b>                 | Y116   | ESAAYPGWF              | -1      | - |
| <b>m10</b>                | C122   | GWFLCTVPEA             | -1      | - |
| <b>m11</b>                | Y150   | ITDFYFQQC              | -1      | - |
| <b>m12</b>                | C154   | YFQQCD                 | -1      | - |

**m13**

Y164

LGKSYNTAF

+1

+

---

\*Neutral charge if H involved as coordination site and is not considered as additional basic residue. \*\*Cysteines alone were shown to be much less or ineffective for heme binding(Brewitz et al., 2015). \*\*\*Will be removed upon proteolytic truncation to achieve biological activity.

**Table S3.** Synthesized peptides and respective peptide mutants of potential HRMs derived from IL-36 $\alpha$ .

Peptides were synthesized via standard Fmoc-based solid phase peptide synthesis and subsequently analyzed by MS, HPLC, and TLC.

| No. | Peptide sequence | M <sub>w</sub> <sup>[a]</sup><br>(M <sub>w</sub> theor.)<br>[g/mol] | Preparative<br>HPLC<br>t <sub>r</sub> [min] | Analytical<br>HPLC<br>t <sub>r</sub> [min] | TLC<br>R <sub>f</sub>                      |
|-----|------------------|---------------------------------------------------------------------|---------------------------------------------|--------------------------------------------|--------------------------------------------|
| 1   | FLFYHSQSG        | 542.77 <sup>[a]</sup> (1083.51)                                     | 71.9 <sup>[c]</sup>                         | 20.4 <sup>[e]</sup>                        | 0.57 <sup>[g]</sup><br>0.71 <sup>[h]</sup> |
| 2   | SEGGAPLIL        | 855.49 <sup>[b]</sup> (854.49)                                      | 65.3 <sup>[d]</sup>                         | 20.6 <sup>[f]</sup>                        | 0.66 <sup>[g]</sup><br>0.73 <sup>[h]</sup> |
| 3   | SEGGCALIL        | 861.43 <sup>[b]</sup> (860.43)                                      | 62.9 <sup>[d]</sup>                         | 21.5 <sup>[f]</sup>                        | 0.57 <sup>[g]</sup><br>0.71 <sup>[h]</sup> |
| 4   | SEGGAALIL        | 829.47 <sup>[b]</sup> (828.47)                                      | 59.7 <sup>[d]</sup>                         | 20.5 <sup>[f]</sup>                        | 0.66 <sup>[g]</sup><br>0.73 <sup>[h]</sup> |
| 5   | FLFYASQSG        | 1018.49 <sup>[b]</sup> (1017.49)                                    | 83.3 <sup>[c]</sup>                         | 21.2 <sup>[e]</sup>                        | 0.66 <sup>[g]</sup><br>0.88 <sup>[h]</sup> |
| 6   | FLFAHSQSG        | 496.75 <sup>[a]</sup> (991.49)                                      | 66.4 <sup>[c]</sup>                         | 17.8 <sup>[e]</sup>                        | 0.51 <sup>[g]</sup><br>0.69 <sup>[h]</sup> |
| 7   | FLFAASQSG        | 463.74 <sup>[a]</sup> (925.47)                                      | 75.5 <sup>[c]</sup>                         | 19.2 <sup>[e]</sup>                        | 0.61 <sup>[g]</sup><br>0.85 <sup>[h]</sup> |

Peptides were measured with LC-ESI-MS and peaks were detected as <sup>[a]</sup>[M+2H]<sup>2+</sup> or [M+H]<sup>+</sup>. Semi-preparative RP-HPLC was applied for peptide purification using <sup>[c]</sup>0-50% eluent B (0.1% TFA in 90% acetonitrile, eluent A: 0.1% TFA in water) in 120 min and <sup>[d]</sup>10-60% eluent B in 120 min as gradients. Analytical HPLC was performed using <sup>[e]</sup>10-50% eluent B (0.1% TFA in acetonitrile, eluent A: 0.1% TFA in water) in 40 min and <sup>[f]</sup>10-40% eluent B in 30 min. For TLC the following systems were applied: <sup>[g]</sup>n-butanol/acetic acid/water (48:18:24, v/v) and <sup>[h]</sup>pyridine/ethyl acetate/acetic acid/water (5:5:1:3, v/v).

**Table S4.** Data of UV/Vis- and resonance Raman spectroscopy of IL-36 $\alpha$ -derived peptides and respective mutants (1-7) in complex with heme. (For peptide sequences see Table S3.)

| No. | $K_D$ for UV/Vis [ $\mu$ M]<br>(wavelength) | Raman<br>coordination state |
|-----|---------------------------------------------|-----------------------------|
| 1   | $4.48 \pm 2.20$<br>(~415 nm)                | 5c(6c)                      |
| 2   | n.b.                                        | -                           |
| 3   | n.d.<br>(~319 nm, ~416 nm)                  | 5c                          |
| 4   | n.b.                                        | -                           |
| 5   | $2.29 \pm 1.32$<br>(~418 nm)                | 5c                          |
| 6   | n.b.                                        | -                           |
| 7   | n.b.                                        | n.p.                        |

$K_D$ , dissociation constant; n.b. no binding; n.p., not possible; 5c, pentacoordinated; 6c, hexacoordinated.

**Table S5.** Structural statistics of the refined NMR solution structure of IL-36 $\alpha$ .

|                                                                    |                 |
|--------------------------------------------------------------------|-----------------|
| <b>Total distance restraints</b>                                   | 4107            |
| • intra ( $ i-j =0$ )                                              | 350             |
| • sequential / short ( $ i-j =1$ )                                 | 1158            |
| • medium ( $1< i-j <5$ )                                           | 767             |
| • long range ( $ i-j \geq 5$ )                                     | 1832            |
| hydrogen bond                                                      | 72              |
| <b>Target function [<math>\text{\AA}^2</math>]</b>                 |                 |
| after (before) energy minimization                                 | 4.13 (4.14)     |
| <b>AMBER physical energies [<math>\text{kcal/mol}^{-1}</math>]</b> |                 |
| before energy minimization                                         | $-4526 \pm 97$  |
| after energy minimization                                          | $-5812 \pm 101$ |
| <b>R.M.S.D. [<math>\text{\AA}</math>]</b>                          |                 |
| mean global r.m.s.d. values                                        |                 |
| all heavy atom (residues 10-158)                                   | $1.52 \pm 0.21$ |
| backbone (residues 10-158)                                         | $0.74 \pm 0.12$ |
| <b>Ramachandran plot [%]</b>                                       |                 |
| Residues in most favored regions                                   | 69.3            |
| in additionally allowed regions                                    | 28.7            |
| in generously allowed regions                                      | 1.9             |
| in disallowed regions                                              | 0.1             |

**Table S6.** CD spectroscopy analysis of the secondary structure content of IL-36 $\alpha$  and trIL-36 $\alpha$  (6-158).

| <b>Protein</b>   | <b>Analysis tool</b> | <b><math>\alpha</math>-helix</b> | <b><math>\beta</math>-sheet</b> | <b>irregular</b> |
|------------------|----------------------|----------------------------------|---------------------------------|------------------|
| IL-36 $\alpha$   | CAPITO               | 10-13%                           | 30-35%                          | 50-60%           |
| IL-36 $\alpha$   | K2D3                 | 9.8%                             | 19.7%                           | 70.5%            |
| trIL-36 $\alpha$ | CAPITO               | 10-13%                           | 32-37%                          | 51-59%           |
| trIL-36 $\alpha$ | K2D3                 | 8.5%                             | 19.5%                           | 72.0%            |



**Table S7.** Backbone RMSD based structural assessment of wild-type IL-36 $\alpha$  and its mutants in a 200 ns MD simulation.

| <b>Protein</b>       | <b>RMSD against model 1 of the NMR ensemble (Å)</b> | <b>RMSD against structure from MD equilibration (Å)</b> |
|----------------------|-----------------------------------------------------|---------------------------------------------------------|
| IL-36 $\alpha$       | 3.34 $\pm$ 0.52                                     | 2.516 $\pm$ 0.6                                         |
| Y108S                | 3.06 $\pm$ 0.32                                     | 2.32 $\pm$ 0.56                                         |
| H109A                | 3.11 $\pm$ 0.24                                     | 2.04 $\pm$ 0.65                                         |
| Y108SH109A           | 2.75 $\pm$ 0.54                                     | 3.00 $\pm$ 1.18                                         |
| C136SP137A           | 2.83 $\pm$ 0.61                                     | 2.63 $\pm$ 0.46                                         |
| Y108SC136SP137A      | 3.17 $\pm$ 0.53                                     | 2.54 $\pm$ 0.82                                         |
| H109AC136SP137A      | 3.67 $\pm$ 0.31                                     | 2.16 $\pm$ 0.5                                          |
| Y108SH109AC136SP137A | 3.30 $\pm$ 0.52                                     | 1.89 $\pm$ 0.67                                         |

RMSD of reference structure 1 w.r.t. NMR ensemble = 0.84 Å;

## **Movie Information**

**Movie S1: Heme binding to both C136 and Y108 residues on the surface of the IL-36 $\alpha$  wild-type protein.** The video is a screen recording of a fast-forwarded molecular dynamics trajectory. The video shows a simulation cell containing the IL-36 $\alpha$  protein with two heme molecules bound to its surface as a result of molecular docking simulations. The protein is displayed in the cartoon style, colored gray. On the protein structure, the residues Y108, H109, and C136 are shown as sticks colored green, magenta, and yellow, respectively. Although the H109 residue does not participate in heme coordination, its orientation is relative to the Y108 residue. The heme molecule bound to the Y108 site is shown as red spheres, while the one bound to the C136 residue is shown as blue spheres. It can be clearly observed that both heme molecules stay bound to the surface of the protein.

**Movie S2: Heme binding to the Y108 residue on the surface of the C136SP137A mutant of IL-36 $\alpha$ .** The video is a screen recording of a fast-forwarded molecular dynamics trajectory. The video shows simulation cell containing the C136SP137A mutant of IL-36 $\alpha$  protein with a heme molecule bound to its surface as a result of molecular docking simulations. The protein is displayed in the cartoon style, colored gray. On the protein structure, the residues Y108 and H109 are shown as sticks colored green and magenta, respectively. Although the H109 residue does not participate in heme coordination, its orientation is relative to the Y108 residue. The heme molecule bound to the Y108 site is shown as red. It can be clearly observed that the heme molecule is quickly dislodged from its binding site on the Y108 residue and moves into the solution shortly after the simulation start. This video shows that in the absence heme binding to the C136 residue heme binding to the Y108 residue is short-lived.
